# Supplementary material for: Controlled release and targeted delivery to cancer cells of doxorubicin from polysaccharide-functionalised single-walled carbon nanotubes
Source: Royal Society of Chemistry journal article supplement (doi:10.1039/c4tb02123a), 2015-01-01
Supplement: c4tb02123a1.pdf [file c4tb02123a1.pdf]

**Controlled release and targeted delivery to cancer cells of doxorubicin from polysaccharide-  
functionalised single-walled carbon nanotubes**

Yunfei Mo <sup>a, b</sup>, Haowen Wang <sup>a, b</sup>, Jianghui Liu <sup>c</sup>, Yong Lan <sup>a, b</sup>, Rui Guo <sup>a, b\*</sup>, Yi Zhang <sup>a, b</sup>, Wei  
Xue <sup>a, b</sup>, Yuanming Zhang <sup>a, d\*</sup>

<sup>a</sup> Key Laboratory of Biomaterials of Guangdong Higher Education Institutes, Jinan University,  
Guangzhou 510632, China

<sup>b</sup> Department of Biomedical Engineering, Jinan University, Guangzhou 510632, China

<sup>c</sup> Department of Emergency, The First Affiliated Hospital of Sun Yat-sen University, Guangzhou  
510080, China

<sup>d</sup> Department of Chemistry, Jinan University, Guangzhou 510632, China

Email: guorui@jnu.edu.cn, tzhangym@jnu.edu.cn

Tel/Fax: +86-20-85224338

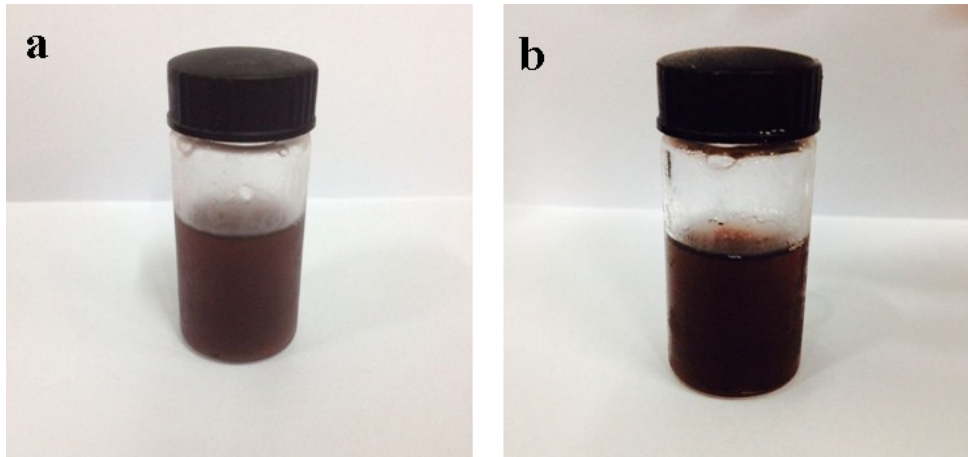

**Fig. S1.** Photos of SWNTs-CHI-HA-DOX in different time. (a) SWNTs-CHI-HA-DOX after preparation, (b) SWNTs-CHI-HA-DOX after storage at 4 °C for more than 30 days.

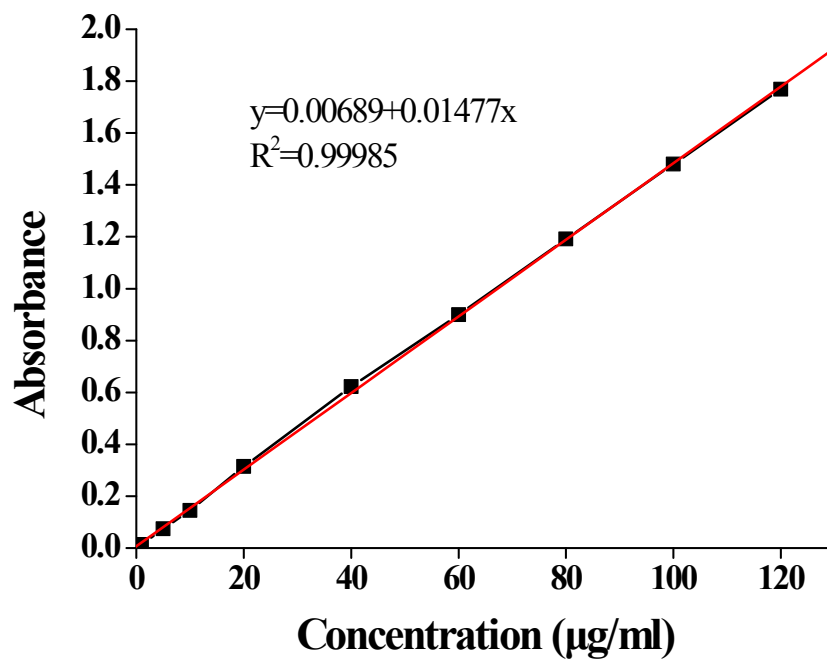

Fig. S2. Calibration curve for DOX.
